# Supplementary material
Source: PubMed Central journal article supplement (PMC8046731)

Supplementary Figure 1b

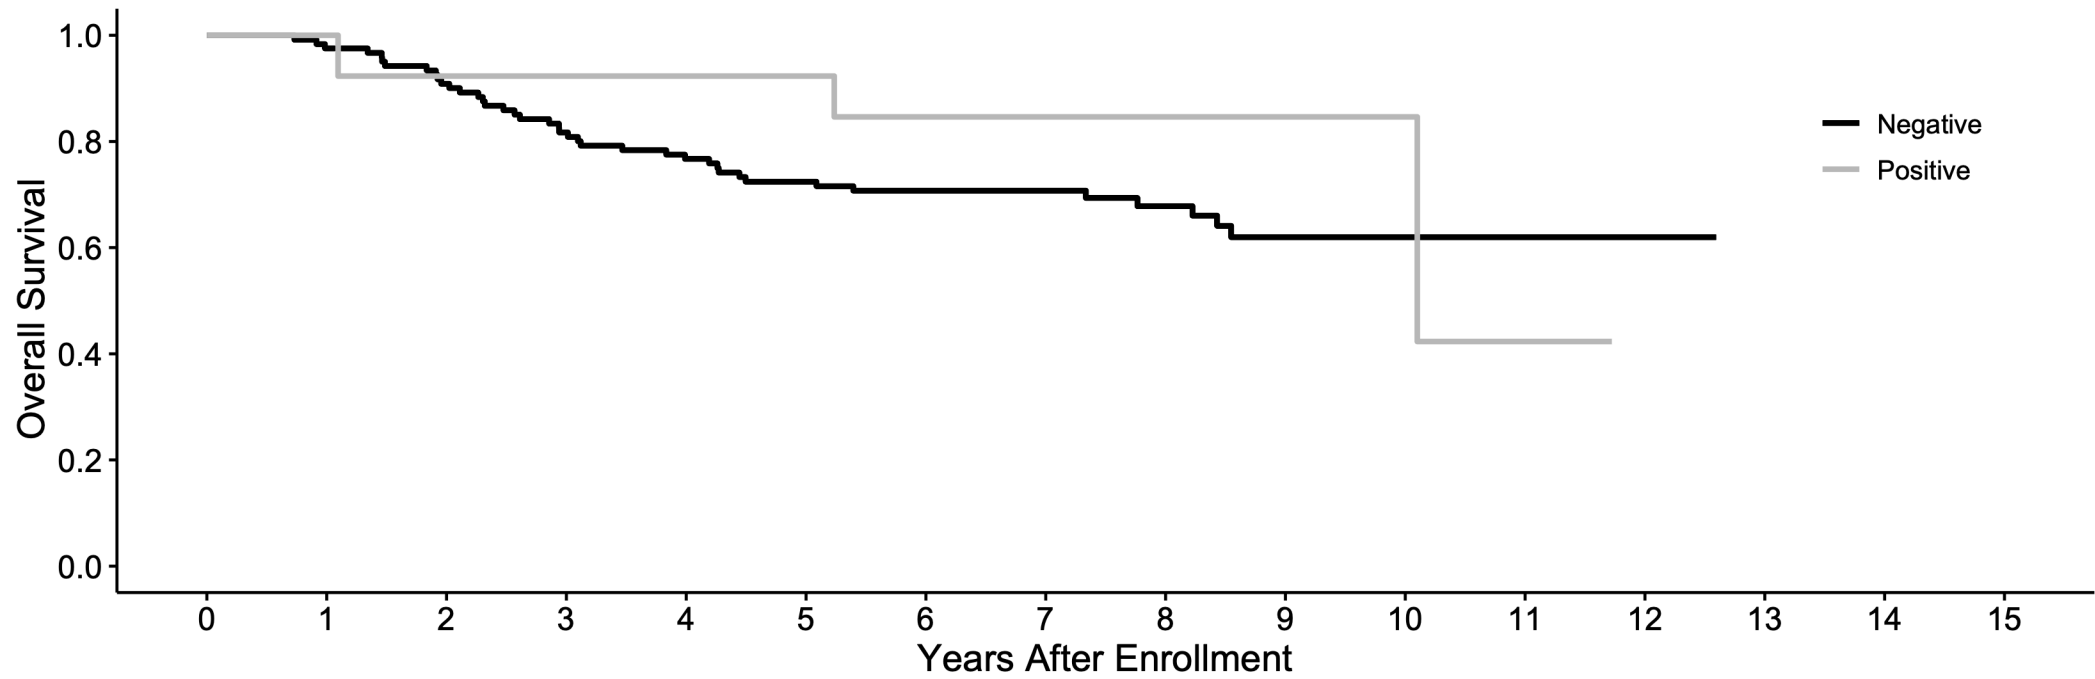

Number at risk (number censored)

|   |         |         |         |        |        |        |        |         |         |         |         |       |       |       |       |       |
|---|---------|---------|---------|--------|--------|--------|--------|---------|---------|---------|---------|-------|-------|-------|-------|-------|
| █ | 121 (0) | 118 (0) | 109 (1) | 98 (0) | 91 (1) | 85 (1) | 77 (6) | 59 (18) | 42 (15) | 26 (13) | 14 (12) | 8 (6) | 3 (5) | 0 (3) | 0 (0) | 0 (0) |
| █ | 13 (0)  | 13 (0)  | 12 (0)  | 12 (0) | 12 (0) | 12 (0) | 11 (0) | 6 (5)   | 5 (1)   | 4 (1)   | 2 (2)   | 1 (0) | 0 (1) | 0 (0) | 0 (0) | 0 (0) |

Supplement: NIHMS1669151-supplement-3.pdf [file NIHMS1669151-supplement-3.pdf]
